# Supplementary material for: Amplexicaule A exerts anti-tumor effects by inducing apoptosis in human breast cancer
Source: PubMed Central journal article supplement (PMC4951306; doi:10.18632/oncotarget.7848), 2016-03-02
Supplement: oncotarget-07-18521-s001.pdf [file oncotarget-07-18521-s001.pdf]

## Amplexicaule A exerts anti-tumor effects by inducing apoptosis in human breast cancer

### Supplementary Materials

**Supplementary Table S1: Effect of APA and APB from PADF on xenografted tumor growth in MCF-7 cells**

| Group  | Dose  | Mice weight (g) |            | Tumor weight |
|--------|-------|-----------------|------------|--------------|
|        | mg/kg | Start           | End        | (g)          |
| Saline | –     | 20.5 ± 1.2      | 27.3 ± 1.1 | 1.43 ± 0.32  |
| APA    | 150   | 21.2 ± 1.3      | 27.4 ± 0.9 | 0.70 ± 0.25* |
| APB    | 150   | 21.1 ± 1.1      | 27.1 ± 1.2 | 1.37 ± 0.26  |

\* $P < 0.05$ , compared to tumor-bearing mice treated with saline.

**Supplementary Table S2: Effect of APA and APB from PADF on xenografted tumor growth in MDA-MB-435 cells**

| Group  | Dose  | Mice weight (g) |            | Tumor weight |
|--------|-------|-----------------|------------|--------------|
|        | mg/kg | Start           | End        | (g)          |
| Saline | –     | 20.2 ± 1.3      | 27.1 ± 1.0 | 1.41 ± 0.35  |
| APA    | 150   | 20.8 ± 1.5      | 27.1 ± 0.9 | 0.68 ± 0.23* |
| APB    | 150   | 21.4 ± 1.5      | 27.3 ± 1.1 | 1.35 ± 0.29  |

\* $P < 0.05$ , compared to tumor-bearing mice treated with saline.

**Supplementary Table S3: Effect of APA from PADF on xenografted tumor growth of MLF-7 cells**

| Group     | Dose  | Mice weight (g) |            | tumor         |
|-----------|-------|-----------------|------------|---------------|
|           | mg/kg | Start           | End        | (g)           |
| Non-tumor | –     | 21.6 ± 0.7      | 26.8 ± 0.8 | –             |
| Saline    | –     | 21.8 ± 0.4      | 27.0 ± 0.7 | 1.43 ± 0.22   |
| CBT       | 10    | 21.7 ± 0.6      | 26.1 ± 1.0 | 0.55 ± 0.05** |
| APA       | 20    | 22.1 ± 0.5      | 27.4 ± 1.1 | 1.03 ± 0.16   |
| APA       | 50    | 21.9 ± 0.4      | 27.1 ± 1.2 | 0.95 ± 0.14*  |
| APA       | 150   | 21.8 ± 0.6      | 27.9 ± 1.1 | 0.71 ± 0.12** |

\* $P < 0.05$ , compared to tumor-bearing mice treated with saline.

**Supplementary Table S4: Effect of APA from PADF on xenografted tumor growth of MDA-MB-435**

| Group     | Dose  | Mice       | weight (g) | tumor weight   |
|-----------|-------|------------|------------|----------------|
|           | mg/kg | Start      | End        | (g)            |
| Non-tumor | –     | 21.4 ± 0.6 | 26.9 ± 0.6 | –              |
| Saline    | –     | 20.8 ± 0.4 | 27.1 ± 0.7 | 1.41 ± 0.21    |
| CBT       | 10    | 21.5 ± 0.5 | 26.1 ± 1.0 | 0.49 ± 0.04**  |
| APA       | 20    | 21.1 ± 0.5 | 27.2 ± 1.3 | 1.01 ± 0.15    |
| APA       | 50    | 21.4 ± 0.2 | 27.3 ± 1.1 | 0.92 ± 0.12 *  |
| APA       | 150   | 21.5 ± 0.5 | 27.1 ± 1.4 | 0.62 ± 0.12 ** |

\* $P < 0.05$ , compared to tumor-bearing mice treated with saline.

**Supplementary Table S5: Effect of APA on serum indexes of liver function**

| Group     | Dosage (mg/kg) | ALT (IU/L)    | AST (IU/L)    |
|-----------|----------------|---------------|---------------|
| Non-tumor | –              | 118.9 ± 12.7  | 512.4 ± 30.6  |
| Saline    | –              | 117.9 ± 12.5  | 510.6 ± 23.1  |
| CBT       | 10             | 293.1 ± 16.8* | 832.7 ± 24.9* |
| APA       | 20             | 116.6 ± 10.9  | 515.7 ± 24.1  |
| APA       | 50             | 120.9 ± 11.5  | 513.8 ± 20.9  |
| APA       | 100            | 118.4 ± 12.9  | 518.7 ± 25.9  |
| APA       | 150            | 119.4 ± 11.8  | 519.4 ± 24.7  |

\* $P < 0.05$ , compared to tumor-bearing mice treated with saline.

**Supplementary Table S6: Effect of APA on renal function indexes in tumor-bearing mice**

| Group     | Dosage (mg/kg) | BUN (IU/L)    | UA(IU/L)    | CRE(IU/L)     |
|-----------|----------------|---------------|-------------|---------------|
| Non-tumor | –              | 6.88 ± 0.49   | 132.8 ± 9.7 | 46.10 ± 1.43  |
| Saline    | –              | 6.98 ± 0.45   | 133.6 ± 9.1 | 46 ± 1.78     |
| CBT       | 10             | 11.98 ± 0.89* | 138.1 ± 8.9 | 64.78 ± 2.14* |
| APA       | 20             | 6.87 ± 0.61   | 134.4 ± 8.6 | 45.10 ± 1.28  |
| APA       | 50             | 6.79 ± 0.51   | 130.5 ± 9.2 | 46 ± 1.87     |
| APA       | 100            | 6.84 ± 1.61   | 132.7 ± 9.4 | 46.32 ± 1.79  |
| APA       | 150            | 6.86 ± 1.54   | 131.9 ± 9.6 | 45.89 ± 1.68  |

\* $P < 0.05$ , compared to tumor-bearing mice treated with saline.

**Supplementary Table S7: Effect of APA on WBC, RBC, HGB and PLT in tumor-bearing mice**

| Group     | Dose | WBC (10 <sup>9</sup> /L) | RBC (10 <sup>12</sup> /L) | HGB (g/L)  | PLT (10 <sup>9</sup> /L) |
|-----------|------|--------------------------|---------------------------|------------|--------------------------|
| Non-tumor |      | 6.12 ± 0.49              | 712 ± 0.23                | 97.8 ± 4.1 | 685.9 ± 41.2             |
| Saline    |      | 7.19 ± 0.62              | 7.36 ± 0.31               | 98.5 ± 4.2 | 701.9 ± 60.2             |
| CBT       | 10   | 2.28 ± 0.44*             | 7.27 ± 0.24               | 96.5 ± 3.7 | 695.9 ± 41.8             |
| APA       | 20   | 7.99 ± 0.64              | 7.41 ± 0.15               | 98.4 ± 3.9 | 686.1 ± 48.9             |
| APA       | 50   | 7.67 ± 0.63              | 7.01 ± 0.16               | 97.3 ± 4.4 | 671.1 ± 55.4             |
| APA       | 100  | 7.25 ± 0.44              | 7.38 ± 0.18               | 98.7 ± 3.9 | 695.8 ± 53.2             |
| APA       | 150  | 7.31 ± 0.39              | 7.41 ± 0.22               | 99.4 ± 4.1 | 699.1 ± 50.2             |

\* $P < 0.05$ , compared to tumor-bearing mice treated with saline.
